# Supplementary material for: Group 6 metal complexes with a hemilabile tridentate xantsil ligand and facile insertion of tBuCN into a W–Si bond [xantsil = (9,9-dimethylxanthene-4,5-diyl)bis(dimethylsilyl)]
Source: Royal Society of Chemistry journal article supplement (doi:10.1039/b512759a), 2005-12-02
Supplement: b512759a.pdf [file b512759a.pdf]

**Group 6 metal complexes with a hemilabile tridentate xantsil ligand and facile insertion of <sup>t</sup>BuCN into a W–Si bond [xantsil = (9,9-dimethylxanthene-4,5-diyl)bis(dimethylsilyl)]**

Rockshana Begum, Takashi Komuro and Hiromi Tobita\*

*Department of Chemistry, Graduate School of Science, Tohoku University, Sendai 980-8578, Japan*

**Synthesis of Cp\*W{ $\kappa^2$ (Si,Si)-xantsil}(CO)<sub>2</sub>(H) (1a).** A Pyrex sample tube (10 mm o.d.) with a Teflon vacuum stopcock was charged with a solution of Cp\*W(CO)<sub>3</sub>Me (20 mg, 0.047 mmol) and xantsilH<sub>2</sub> (16 mg, 0.049 mmol) in pentane (*ca.* 2 mL) and degassed under vacuum. The mixture was irradiated with a 450 W medium pressure Hg lamp for 20 minutes at 7 °C. During the photoreaction, the mixture was degassed at 5 minutes intervals by a freeze-pump-thaw cycle on a vacuum line. After removal of the volatiles, the residue was washed with pentane several times and dried. Compound **1a** was obtained as a white powder (27 mg, 0.038 mmol, 80%). Found: C, 53.16; H, 5.89. Calc. for C<sub>31</sub>H<sub>40</sub>O<sub>3</sub>Si<sub>2</sub>W: C, 53.14; H, 5.75. IR (KBr): 1901 (s,  $\nu_{\text{CO}}$ ), 1844 (m,  $\nu_{\text{CO}}$ ), cm<sup>-1</sup>. <sup>1</sup>H NMR (300 MHz, C<sub>6</sub>D<sub>6</sub>):  $\delta$  7.43 (dd, 2 H,  $J = 7.4$ , 1.4 Hz, ArH), 7.24 (dd, 2 H,  $J = 7.4$ , 1.4 Hz, ArH), 7.06 (t, 2 H,  $J = 7.4$  Hz, ArH), 1.57 (s, 3 H, CMe<sub>2</sub>), 1.35 (s, 3 H, CMe<sub>2</sub>), 1.23 (s, 6 H, SiMe<sub>2</sub>), 1.21 (s, 15 H, C<sub>5</sub>Me<sub>5</sub>), 1.10 (s, 6 H, SiMe<sub>2</sub>), -3.95 (s, 1 H,  $^1J_{\text{WH}} = 83$  Hz,  $^1J_{\text{SiH}} = 24$  Hz, W–H). <sup>13</sup>C {<sup>1</sup>H} NMR (75.5 MHz, toluene-*d*<sub>8</sub>):  $\delta$  223.4 (CO), 160.2, 133.0, 129.1, 125.3, 123.3 (ArC, one of the signals is overlapped with those of toluene-*d*<sub>8</sub>), 102.7 (C<sub>5</sub>Me<sub>5</sub>), 36.5 (CMe<sub>2</sub>), 31.1 (CMe<sub>2</sub>), 22.9 (CMe<sub>2</sub>), 10.2 (C<sub>5</sub>Me<sub>5</sub>), 9.1 (SiMe<sub>2</sub>), 2.7 (SiMe<sub>2</sub>). <sup>29</sup>Si {<sup>1</sup>H} NMR (59.6 MHz, toluene-*d*<sub>8</sub>): 10.8 ( $^1J_{\text{WSi}} = 14$  Hz). MS (EI):  $m/z$  700 (M<sup>+</sup>), 672 (M<sup>+</sup>–CO), 644 (M<sup>+</sup>–2CO).

**Synthesis of Cp\*Mo{ $\kappa^2$ (Si,Si)-xantsil}(CO)<sub>2</sub>(H) (1b):** A mixture of Cp\*Mo(CO)<sub>3</sub>Me (20 mg, 0.060 mmol) and xantsilH<sub>2</sub> (20 mg, 0.061 mmol) in pentane (*ca.* 2 mL) was irradiated as described for **1a**. Workup similar to that used for **1a** yielded **1b** as a white powder (29 mg, 0.047 mmol, 78%). Found: C, 60.77; H, 6.74. Calc. for C<sub>31</sub>H<sub>40</sub>O<sub>3</sub>Si<sub>2</sub>Mo: C, 60.76; H, 6.58. IR (KBr): 1909 (s,  $\nu_{\text{CO}}$ ), 1851 (m,  $\nu_{\text{CO}}$ ) cm<sup>-1</sup>. <sup>1</sup>H NMR (300 MHz, toluene-*d*<sub>8</sub>):  $\delta$  7.32 (dd, 2 H,  $J = 7.4, 1.4$  Hz, ArH), 7.14 (dd, 2 H,  $J = 7.4, 1.4$  Hz, ArH), 6.96 (t, 2 H,  $J = 7.4$  Hz, ArH), 1.49 (s, 3 H, CMe<sub>2</sub>), 1.27 (s, 3 H, CMe<sub>2</sub>), 1.11 (s, 15 H, C<sub>5</sub>Me<sub>5</sub>), 1.10 (s, 6 H, SiMe<sub>2</sub>), 0.81 (s, 6 H, SiMe<sub>2</sub>), -5.65 (s, 1 H,  $^2J_{\text{SiH}} = 37$  Hz, Mo-H). <sup>13</sup>C{<sup>1</sup>H} NMR (75.5 MHz, toluene-*d*<sub>8</sub>):  $\delta$  232.7 (CO), 160.2, 134.6, 133.0, 129.4, 123.4 (ArC, one of the signals is overlapped with those of toluene-*d*<sub>8</sub>), 103.7 (C<sub>5</sub>Me<sub>5</sub>), 36.4 (CMe<sub>2</sub>), 31.0 (CMe<sub>2</sub>), 22.8 (CMe<sub>2</sub>), 10.2 (C<sub>5</sub>Me<sub>5</sub>), 8.3 (SiMe<sub>2</sub>), 4.1 (SiMe<sub>2</sub>). <sup>29</sup>Si{<sup>1</sup>H} NMR (59.6 MHz, toluene-*d*<sub>8</sub>):  $\delta$  15.2. MS (EI):  $m/z$  614 (M<sup>+</sup>).

**Synthesis of Cp\*W{ $\kappa^3$ (Si,Si,O)-xantsil}(CO)(H) (2a).** A solution of **1a** (33 mg, 0.047 mmol) in toluene (*ca.* 1 mL) was placed in a Pyrex sample tube (10 mm o.d.) with a Teflon vacuum stopcock and was irradiated with a 450 W medium pressure Hg lamp for 50 minutes at 7 °C. The reaction mixture was degassed at 20 minutes intervals by a freeze-pump-thaw cycle on a vacuum line. After removal of the volatiles, the residue was washed with hexane and dried. Compound **2a** was obtained as an orange powder (29 mg, 0.043 mmol, 92%). Found: C, 53.67; H, 6.07. Calc. for C<sub>30</sub>H<sub>40</sub>O<sub>2</sub>Si<sub>2</sub>W: C, 53.57; H, 5.99. IR (KBr): 1813 (s,  $\nu_{\text{CO}}$ ) cm<sup>-1</sup>. <sup>1</sup>H NMR (300 MHz, C<sub>6</sub>D<sub>6</sub>):  $\delta$  7.37-7.50 (m, 2 H, ArH), 6.84-7.01 (m, 4 H, ArH), 1.69 (s, 15 H, C<sub>5</sub>Me<sub>5</sub>), 1.38 (s, 3 H, CMe<sub>2</sub>), 1.24 (s, 3 H, CMe<sub>2</sub>), 0.98 (s, 6 H, SiMe<sub>2</sub>), 0.91 (br s, 6 H, SiMe<sub>2</sub>), 0.78 (s, 1 H, W-H). <sup>13</sup>C{<sup>1</sup>H} NMR (75.5 MHz, toluene-*d*<sub>8</sub>):  $\delta$  231.5 (CO), 162.3, 141.1, 133.6, 130.8, 125.7, 123.9 (ArC), 99.9 (C<sub>5</sub>Me<sub>5</sub>), 35.7 (CMe<sub>2</sub>), 33.1 (CMe<sub>2</sub>), 24.4 (CMe<sub>2</sub>), 11.3 (C<sub>5</sub>Me<sub>5</sub>), 10.6 (SiMe<sub>2</sub>), 5.6 (br, SiMe<sub>2</sub>). MS (EI):  $m/z$  672 (M<sup>+</sup>), 644 (M<sup>+</sup>-CO).

**Synthesis of Cp\*Mo{ $\kappa^3$ (Si,Si,O)-xantsil}(CO)(H) (2b).** Complex **2b** was prepared by the photoreaction of **1b** (17 mg, 0.027 mmol) in a manner similar to that used for **2a**. The product was isolated as an orange powder (14 mg, 0.023 mmol, 88%).

Found: C, 61.27; H, 6.88. Calc. for  $C_{30}H_{40}O_2Si_2Mo$ : C, 61.62; H, 6.89. IR (KBr): 1819 (s,  $\nu_{CO}$ ),  $cm^{-1}$ .  $^1H$  NMR (300 MHz, toluene- $d_8$ ):  $\delta$  7.26-7.34 (m, 2 H, ArH), 6.74-6.89 (m, 4 H, ArH), 1.62 (s, 15 H,  $C_5Me_5$ ), 1.38 (s, 3 H,  $CMe_2$ ), 1.23 (s, 3 H,  $CMe_2$ ), 0.90 (s, 6 H,  $SiMe_2$ ), 0.82 (s, 6 H,  $SiMe_2$ ), -2.30 (s, 1 H, Mo-H).  $^{13}C\{^1H\}$  NMR (75.5 MHz, toluene- $d_8$ ): 236.3 (CO), 160.5, 138.6, 133.3, 130.5, 125.2, 123.8 (ArC), 101.3 ( $C_5Me_5$ ), 35.5 ( $CMe_2$ ), 33.2 ( $CMe_2$ ), 24.1 ( $CMe_2$ ), 11.2 ( $C_5Me_5$ ), 10.3 ( $SiMe_2$ ), 5.2 ( $SiMe_2$ ).  $^{29}Si\{^1H\}$  NMR (59.6 MHz, toluene- $d_8$ ): 32.7.

**Synthesis of  $Cp^*W\{\kappa^3(Si,N,C)\text{-xantsil}(N=C^tBu)\}(CO)(H)$  (**3**).** A toluene (3 mL) solution of **2a** (20 mg, 0.029 mmol) and  $tBuCN$  (12 mg, 0.14 mmol) was stirred at room temperature under an atmosphere of dinitrogen. The solution immediately turned from orange-red to purple. After stirring for 90 minutes, volatiles were removed under reduced pressure. Washing the residue with pentane and drying under vacuum gave a purple powder of **3** (19 mg, 0.025 mmol, 85%). Found: C, 55.51; H, 6.49; N, 1.74. Calc. for  $C_{35}H_{49}NO_2Si_2W$ : C, 55.62; H, 6.53; N, 1.85. IR (KBr): 1790 (s,  $\nu_{CO}$ ), 1606 (m,  $\nu_{CN}$ )  $cm^{-1}$ .  $^1H$  NMR (300 MHz,  $C_6D_6$ ):  $\delta$  7.71-7.77 (m, 1 H, ArH), 7.25-7.32 (m, 2 H, ArH), 6.97-7.09 (m, 3 H, ArH), 1.89 (s, 15 H,  $C_5Me_5$ ), 1.53 (s, 3 H,  $CMe_2$ ), 1.30 (s, 3 H,  $CMe_2$ ), 1.20 (s, 3 H,  $SiMe_2$ ), 1.05 (s, 3 H,  $SiMe_2$ ), 0.83 (s, 3 H,  $SiMe_2$ ), 0.81 (s, 9 H,  $tBu$ ), 0.46 (s, 3 H,  $SiMe_2$ ), the W-H signal could not be observed probably due to the overlap with other signals. Thermal instability of **3** in  $C_6D_6$  at room temperature prevents us from measuring the  $^{13}C\{^1H\}$  and  $^{29}Si\{^1H\}$  NMR spectra. MS (EI):  $m/z$  755 ( $M^+$ ), 727 ( $M^+-CO$ ).

**X-ray Crystal Structure Determination of **2a** and **3**.** X-ray quality single crystals were obtained from toluene/hexane at  $-20$  °C for **2a** as orange crystals and **3** as purple crystals. Intensity data for the analysis were collected on a Rigaku RAXIS-RAPID imaging plate diffractometer with graphite-monochromated Mo  $K\alpha$  radiation ( $\lambda = 0.71069$  Å) under a cold nitrogen stream ( $T = 150$  K). Both structures were solved by direct methods using the SHELXS-97 program and refined by full matrix least-squares techniques on all  $F^2$  data with SHELXL-97.<sup>1</sup> Anisotropic refinement was

applied to all non-hydrogen atoms, and all the hydrogen atoms except a hydrido ligand were put at calculated positions. The metal-hydrido hydrogens were not located in the difference map and were not included in the refinement. CCDC reference numbers 284200 (**2a**) and 284201 (**3**). Refinement of the Flack parameter for **2a** yielded 0.02(1), confirming the correct polarity.<sup>2</sup> The structure of **3** was solved as a racemic twin (BASF = 0.318) in the acentric space group  $P2_12_12_1$ . Crystallographic data are available as CIF files.

### References

1. G. M. Sheldrick, *SHELXS-97, Programs for Solving X-ray Crystal Structures*, University of Göttingen, 1997; G. M. Sheldrick, *SHELXL-97, Programs for Refining X-ray Crystal Structures*, University of Göttingen, 1997.
2. H. D. Flack, *Acta Crystallogr., Sect. A*, 1983, **39**, 876.
